# 1 Nested phylogenetic conflicts and deep phylogenomics in plants

2 Stephen A. Smith<sup>1</sup>, Joseph F. Walker<sup>1</sup>, Joseph W. Brown<sup>2</sup>, Nathanael Walker-Hale<sup>1</sup>

3 *Author Affiliation:* <sup>1</sup>*Department of Ecology and Evolution Biology, University of Michigan,* <sup>2</sup>*Department*  
4 *of Animal and Plant Sciences, University of Sheffield*

5 *Keywords:* *phylogenomics, phylogenetics, angiosperms, gene-tree conflict, genomics, coalescent*

## 6 Abstract

7 Recent studies have demonstrated that extensive gene tree conflict underly several important phy-  
8 logenetic relationships and that alternative species tree methods produce inconsistent results for  
9 recalcitrant lineages. Here, we focused on resolving several contentious, but evolutionarily significant,  
10 relationships across land plants using methods that isolate phylogenetic branches. These analyses  
11 provide insight into the source of conflict among species tree methods, disentangling aspects which may  
12 have influenced previously inferred phylogenies and providing greater confidence in estimated species  
13 relationships. Specifically, our results support the hypotheses that *Amborella* is sister to the remaining  
14 extant angiosperms, that extant gymnosperms are monophyletic, and that the Gnetales are sister to  
15 the pines. Several other contentious relationships, including the resolution of relationships among both  
16 the bryophytes and the eudicots, remain uncertain given the relatively low number of supporting gene  
17 trees. Our analyses also suggest that significant biological or systematic error may severely limit the  
18 amount of informative data. Furthermore, using a novel combinatorial heuristic, we demonstrate that  
19 the underlying conflicting signal does not support broad concatenation of gene regions, even when  
20 filtering gene regions by supporting relationships. The approach explored here offers a means to isolate  
21 and analyze underlying phylogenetic signal that can be applied across the Tree of Life.

## 22 Introduction

23 Over the last few years, we have come to understand that phylogenetic conflict is a common feature  
24 across the tree of life and it inhibits our ability to resolve fundamentally important relationships. Such  
25 persistent phylogenetic conflict has been noted throughout land plants, a clade which represents roughly  
26 half a million species and is one of the most diverse and ecologically significant clades on Earth. Despite  
27 the importance of land plants, several relationships which are crucial to an evolutionary understanding  
28 of key biological features remain unresolved. For example, the relationships among the lineages of  
29 bryophytes (i.e., hornworts, liverworts, and mosses) remain unclear despite extensive data collection  
30 efforts (Wickett et al. 2014; Puttick et al. 2018). One of the most heavily debated lineages in plant  
31 phylogenetics has been the placement of the monotypic *Amborella*, whose conflicting placements alter  
32 our understanding of early flowering plant evolution. *Amborella* has been variously placed as sister  
33 to Nymphaeales, as sister to all angiosperms, or as sister to the remaining Angiosperms excluding  
34 Nymphaeales (Xi et al. 2014). The resolution of *Amborella*, along with other contentious relationships  
35 across land plants, would provide greater confidence in our understanding of the evolution of early  
36 reproductive ecology, the evolution of floral development, and the life history of early land plants (Feild  
37 et al. 2004; Sauquet et al. 2017).

38 Due in large part to the recent reduction in the effort and expense required to generate molecular

39 sequences, researchers have amassed these large genomic and transcriptomic datasets meant to resolve  
40 fundamental phylogenetic relationships across the tree of life including in plants (Wickett et al. 2014),  
41 animals (Jarvis et al. 2014; Dunn et al. 2008; Simion et al. 2017; Whelan et al. 2017), fungi (Shen et  
42 al. 2016), and bacteria (Ahrenfeldt et al. 2017). While the goals of these data collection efforts have  
43 been to increase the overall phylogenetic support for evolutionarily significant relationships, several  
44 recent analyses have demonstrated that different datasets and analytical approaches often reconstruct  
45 strongly-supported but conflicting relationships (Feuda et al. 2017; Walker et al. 2018; Shen, Hittinger,  
46 and Rokas 2017). Underlying these conflicting results are typically strongly conflicting individual gene  
47 trees relationships (Smith et al. 2015). In some cases, one or two “outlier” genes can overrule thousands  
48 of other genes in the resolution of relationships (Shen, Hittinger, and Rokas 2017; Brown and Thomson  
49 2016; Walker, Brown, and Smith 2018). These genes may be the result of biological processes (e.g.  
50 Walker, Brown, and Smith 2018) or systematic error (Brown and Thomson 2016) and their removal  
51 may alter the inferred species relationships. Whether dealing with overall gene tree conflict or outlier  
52 genes, the analysis of these large phylogenomic datasets requires detailed consideration.

53 Traditionally researchers have had two ways to deal with large phylogenomic questions: concatenated  
54 supermatrices and coalescent gene-tree / species tree methods. Supermatrix methods were, in part,  
55 developed to allow for the strongest signal to prevail when conducting phylogenetic analyses. However,  
56 it has long been understood that the ‘total evidence’ paradigm (Kluge 1989), where the true history will  
57 ‘win out’ if only enough data are collected, is untenable. For example, genes with real and conflicting  
58 histories are present within datasets (Maddison 1997). Later, a new paradigm was heralded for  
59 phylogenetic systematics (Edwards, Liu, and Pearl 2007; Liu et al. 2009): that of ‘species tree’ inference,  
60 where the strict assumption that gene trees must share the same topology is relaxed (Edwards 2009;  
61 Edwards et al. 2016). For phylogenomic studies, analyses that accommodate incomplete lineage sorting  
62 (ILS) are often conducted alongside analyses that concatenate genes into a supermatrix, with almost all  
63 studies resulting in discordance involving at least one contentious focal relationship. Despite the wide  
64 adoption of both approaches, concatenation and species tree methods make different assumptions. For  
65 example, concatenation approaches, while allowing mixed molecular models and gene-specific branch  
66 lengths, assume a single underlying tree. Coalescent approaches, depending on the implementation,  
67 may assume that all conflict is the result of ILS, that all genes evolved under selective neutrality and  
68 constant effective population size, that all genes contain enough information to properly resolve nodes,  
69 and that gene trees are estimated accurately (Springer and Gatesy 2016).

70 It may be the case that neither of these two approaches is valid for unfiltered phylogenomic datasets given  
71 the underlying variation and the diversity of processes leading to gene tree discordance. Importantly,  
72 the suitability of each method may differ widely clade-to-clade based on which biological processes  
73 have occurred during evolutionary history. Some researchers have explored other approaches that allow  
74 for incorporation of the processes that lead to gene tree discordance (Ané et al. 2006; Boussau et al.  
75 2013). However, these two widely-used methods are often computationally intractable for the enormous  
76 scale of current genomic datasets. Indeed, the distinction between concatenation and coalescent-based  
77 methods, and their conclusions for certain contentious relationships, is such that systematists are  
78 seemingly faced with a dichotomy. We argue that methods and approaches which focus on analyzing a  
79 given contentious relationship in the data render this dichotomy a false one, and should be pursued by  
80 additional methods to advance our understanding of the Tree of Life.

81 Here, we reanalyzed a large plant genomic dataset (Wickett et al. 2014) to isolate phylogenetic signal  
82 of particularly contentious relationships. Specifically, we explored an alternative to concatenation

83 and species-tree approaches for analyzing the signal for individual species relationships. We examine  
84 systematic error, nested conflicting relationships, and quantify the extent of gene tree disagreement.  
85 Furthermore, we investigated the assumption of a single underlying tree, by examining the suitability of  
86 a concatenation approach for species tree resolution. By taking this broad information-centric approach,  
87 we hope to shed more light on the evolution of plants and present a more biologically-informed method  
88 with broad applicability for phylogenomic datasets across the Tree of Life.

## 89 Results and Discussion

### 90 Conflict analyses

91 We conducted analyses comparing gene trees to each other and to the maximum likelihood tree (Fig.  
92 1) based on the concatenated maximum likelihood (ML) analysis from Wickett et al. (2014). We found  
93 that both gene tree conflict and support varied through time with support increasing toward the present  
94 (Fig. 2). We aimed to resolve specific contentious relationships, the resolution of which has either been  
95 debated in the literature or been considered important in resolving key evolutionary questions, to the  
96 best of the ability of the underlying data (Table 1).

97 Several conflicting relationships were the result of systematic error in the underlying data. In order  
98 to minimize the impact of systematic error on the estimation of relationships, we excluded obvious  
99 error where possible. For example, we found 258 of 852 gene trees contained non-land plant taxa that  
100 fell within the land plants. While these errors may not impact the estimation of relationships within  
101 eudicots, they will impact the estimation of relationships at the origin of land plants. Therefore, we  
102 excluded gene trees for which there was not previously well established monophyly of the focal taxa  
103 (i.e., involving the relationship of interest). We also identified 68 gene trees that possessed very long  
104 estimated branch lengths ( $> 2.5$  expected substitutions per site). We conservatively considered these to  
105 contain potential errors in homology (Yang and Smith 2014). While these genes demonstrate patterns  
106 associated with systematic error, they also, likely, contain information for several relationships. However,  
107 some error may be the result of misidentified orthology that will mislead estimation of phylogenetic  
108 relationships, even if this error may not impact all relationships inferred by the gene. Therefore, to  
109 minimize sources of systematic error, we took a conservative approach and excluded these genes from  
110 additional analyses.

111 We found several contentious relationships display patterns similar to those expected under an ILS model,  
112 such as at the origin of angiosperms (e.g., *Amborella* in Table 1), where the number of genes supporting  
113 alternative resolutions were roughly equal. This corresponds to the recovery of these relationships by  
114 coalescent analyses in the original study (Wickett et al. 2014). However, in addition to the number  
115 of genes, we also compared the sum of the difference in the likelihoods for relationships for each gene  
116 (see Material and Methods). The difference between the number of gene trees supporting relationships  
117 and the difference in the summed likelihoods provide insight into the reason for discordance between  
118 concatenated ML analyses and coalescent analyses. For example, the relationship involving Gnetales  
119 and the conifers as sister (Gnetifers) was recovered in coalescent-based analysis and is supported  
120 by more genes (Table 1). However, the sum of the differences in the log-likelihoods of alternative  
121 resolutions support the Gnepine relationship (i.e., Gnetales sister to Pinales), as found in the ML  
122 analyses. The gene trees equivocally support several relationships for eudicots and bryophytes. However,  
123 once log-likelihoods are compared, a dominant relationship emerged (Fig 2).

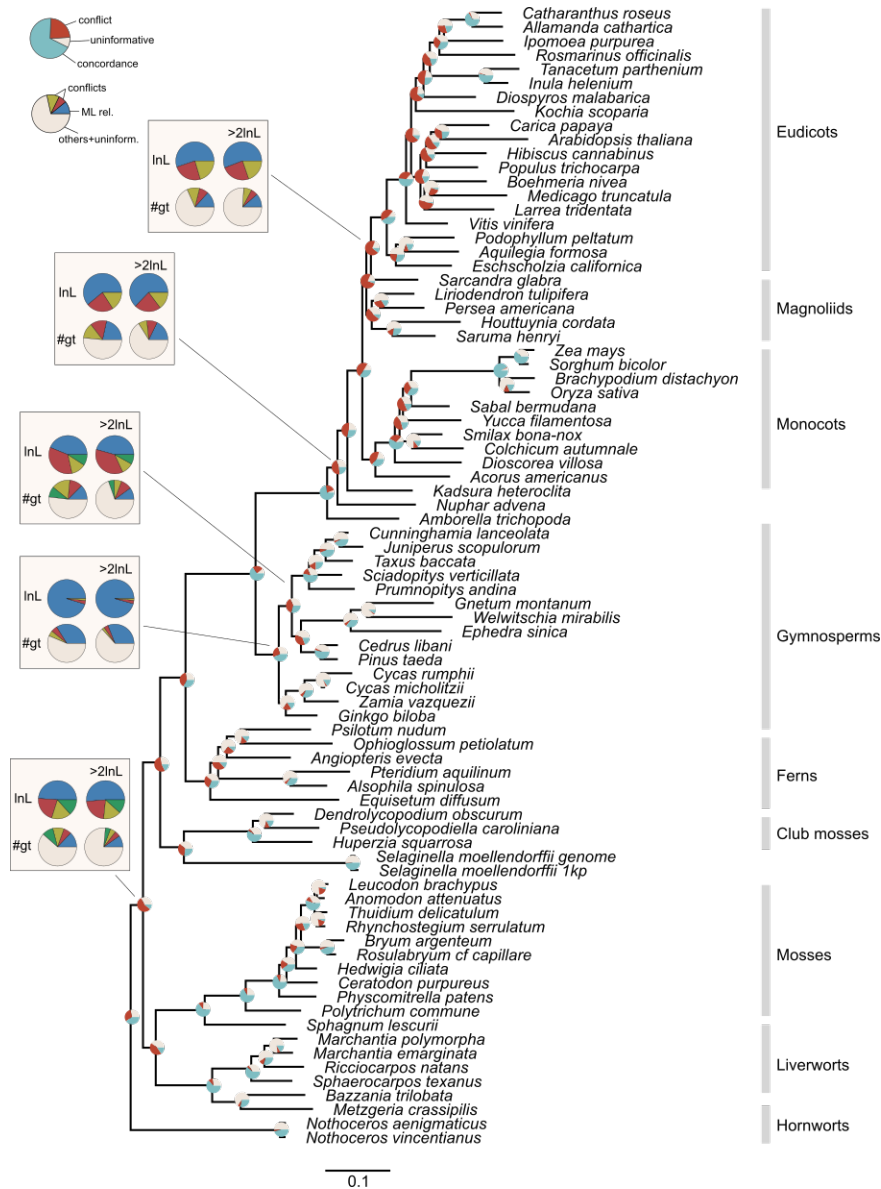

Figure 1: Phylogeny of land plants with pie charts at nodes illustrating conflict, concordance, and informativeness of the gene tree set without any filtering. Inset boxes show summed differences in log likelihoods (top row) and the number of gene trees (bottom row) that support the relationship shown in the tree and the dominant conflicting relationships. Right pie charts in the inset box show results when only differences greater than 2 log likelihoods are considered. See also Table 1.

124 Table 1. Comparison of the number of genes and the difference in the likelihood ( $D\ln L$ ) with relationships  
 125 ordered based on support. \* indicates relationships present in the ML tree.

| Major clade      | Resolutions                      | Genes | Genes ( $> 2\ln L$ ) | $D\ln L$ | $D\ln L > 2$ |
|------------------|----------------------------------|-------|----------------------|----------|--------------|
| Bryophytes       | Hornworts sister*                | 110   | 83                   | 677.6    | 654.1        |
|                  | Liverworts sister                | 56    | 41                   | 294.1    | 280.8        |
|                  | Mosses+liverworts                | 81    | 40                   | 228.9    | 190.2        |
|                  | All monophyly                    | 81    | 37                   | 185.3    | 148.5        |
| Gymnosperms      | monophyly*                       | 288   | 264                  | 7259.0   | 7233.8       |
|                  | <i>Gnetum</i> sister             | 45    | 31                   | 229.8    | 216.0        |
|                  | <i>Cycas</i> sister              | 39    | 18                   | 120.3    | 105.2        |
| Gymno relat.     | Gnepine*                         | 107   | 85                   | 1017.2   | 994.4        |
|                  | conifers                         | 93    | 79                   | 800.0    | 787.2        |
|                  | Gnetifers                        | 134   | 55                   | 288.1    | 217.8        |
|                  | Gnetales sister                  | 76    | 40                   | 211.2    | 176.3        |
| <i>Amborella</i> | <i>Amborella</i> sister*         | 184   | 152                  | 1501.1   | 1470.0       |
|                  | <i>Amborella</i> + <i>Nuphar</i> | 118   | 75                   | 564.2    | 526.3        |
|                  | <i>Nuphar</i> sister             | 111   | 62                   | 392.2    | 345.2        |
| Eudicots         | Magnoliids+eudicots*             | 114   | 98                   | 1223.4   | 1204.3       |
|                  | Monocots+eudicots                | 66    | 49                   | 541.5    | 526.5        |
|                  | Monocots+magnoliids              | 90    | 58                   | 453.3    | 425.5        |

## 126 Nested analyses

127 Given the variation in support and conflict through time (Fig. 2), many genes that contain signal for a  
 128 particular relationship may disagree with the resolution at other nodes. To examine these patterns of  
 129 nested conflict, we examined the genes that support the resolution of the eudicot relationships (Fig 3).  
 130 In a set of 127 genes which supported the eudicot relationships recovered in the original ML analysis,  
 131 98 survived filtering for outgroup placement, branch length, and support with a statistically significant  
 132 difference in  $\ln L$  ( $> 2$ ; Edwards 1984). 63 of these genes supported the monophyly of gymnosperms,  
 133 and among those 63 only 25 supported a sister relationship between pines and *Gnetum*.

134 This analysis demonstrates the significant variation in the support for different relationships throughout  
 135 the tree. Even without gene tree conflict, it is perhaps naïve to expect a single gene to have high  
 136 support throughout a large part of the tree of life (see Penny et al. (1990); MUTOG: the ‘Myth of  
 137 a Universal Tree from One Gene’). This is especially unlikely when the phylogeny of interest spans  
 138 relatively old and young ages as is the case explored here. For this reason, some researchers have thus  
 139 argued that concatenating genes effectively combines data informative at various scales and so provides  
 140 the necessary information to better resolve deep and shallow nodes (e.g., Mirarab, Bayzid, et al. 2014).  
 141 However, it is not clear whether conflicting signal can be overcome with concatenation, and so we  
 142 address this question below.

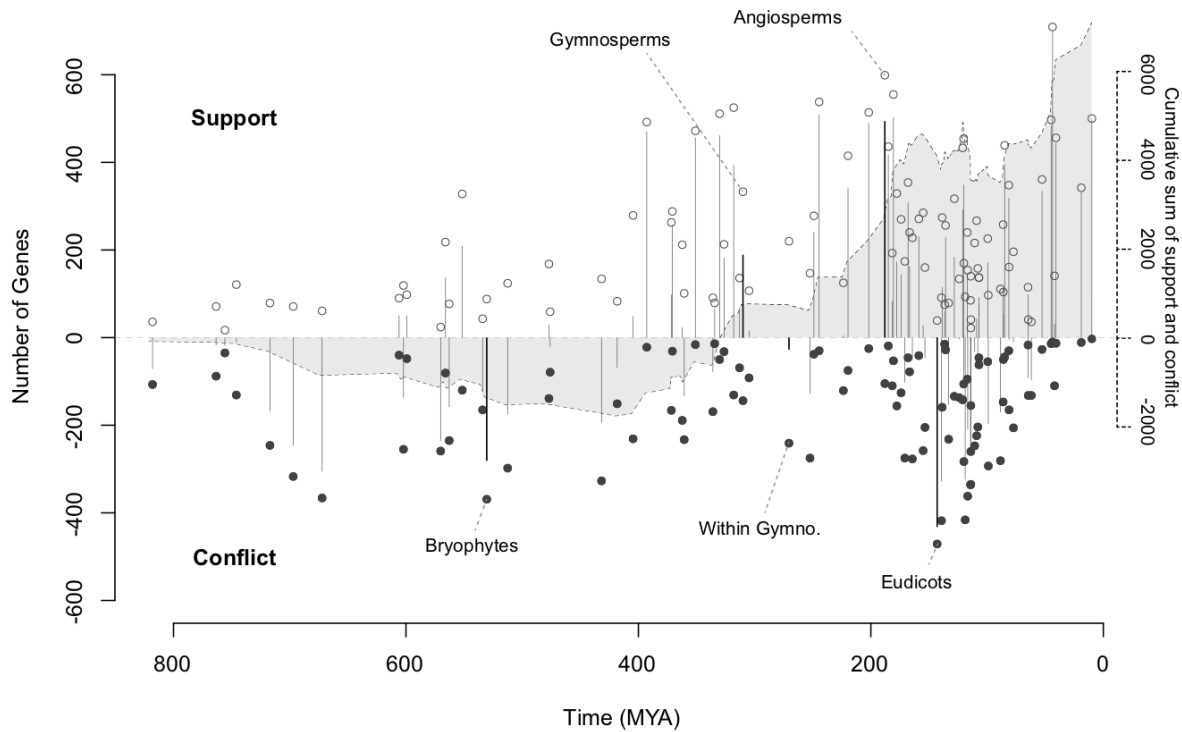

Figure 2: Examination of support and conflict in relation to time across all nodes with time as estimated using TIMETREE (Hedges, Dudley, and Kumar 2006). The differences between support and conflict are noted with vertical lines. The cumulative sum of support and conflict through time is noted in solid grey. Focal nodes from Fig. 1 are identified.

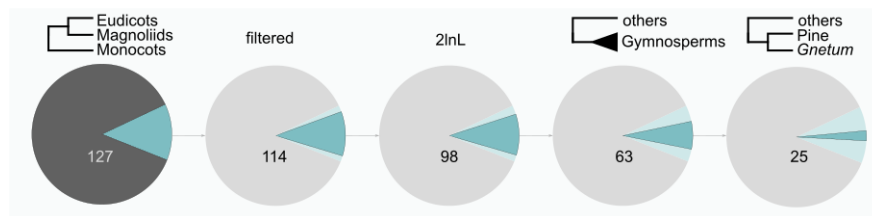

Figure 3: Nested patterns of support with genes associated with the resolution of eudicots. From left to right are shown the genes that support eudicots as sister to magnoliids (far left), those genes filtered as not having any outgroup errors or long branch lengths, those genes that support the resolution by at least 2lnL, those genes that support monophyletic gymnosperms, and finally those genes that support the Gnepine relationship.

## 143 **Combinability of genes**

144 Despite the potential benefits of concatenating genes (i.e., amplifying weak phylogenetic signal), the  
145 underlying model of evolution for a concatenated analysis assumes topological concordance among gene  
146 tree histories. Given extensive gene conflicts, nested and otherwise, it may be that these assumptions  
147 should often be violated. Whether genes should be combined for a concatenated analysis has been  
148 discussed (Huelsenbeck, Bull, and Cunningham 1996; Theobald 2010; Walker, Brown, and Smith 2018)  
149 along with the recent development of Bayesian methods meant to address these issues (Neupane et  
150 al. 2018). Here, given the large size of the dataset, we rely on information theoretic methods (e.g.,  
151 AICc) that greedily test combinability of genes sets based on Robinson Foulds distances to examine  
152 whether genes can be justifiably concatenated despite heterogeneity in information content throughout  
153 the phylogeny. We refer to this as the COMBination of datasets (COMB) method. Because our  
154 approach bears conceptual similarity to algorithms used to estimate the optimal partitioning scheme  
155 (e.g. PartitionFinder, Lanfear et al. 2016), we compared combinable subsets to those recommended  
156 by the implementation of the PartitionFinder algorithm in IQ-TREE (Kalyaanamoorthy et al. 2017,  
157 referred to as MERGE here). Since an exhaustive search of the entire dataset is intractable, we examined  
158 the combinability of those genes that support the eudicot lineages to be sister to the magnoliid lineages  
159 (Fig. 3). We conducted analyses of two sets of genes: those that support the relationship with greater  
160 than 2 lnL versus alternative relationships (98 genes; ‘CombinedSet’), and those that display the  
161 relationship in the ML gene tree and have SH-aLRT support greater than 80 (44 genes; ‘MLSet’). These  
162 two sets were chosen because the first set was already examined as part of this study and the second is  
163 a typical cutoff used in standard systematics analyses (Guindon et al. 2010).

164 No method or gene set supported the concatenation of all genes that supported the focal eudicot  
165 relationship (see Table 2). The COMB method on the ‘CombinedSet’ supported some concatenation of  
166 29 of 98 total genes: 13 sets consisting of two genes, and one set which consisting of three genes. The  
167 MERGE method supported concatenation of 28 of 98 genes in the Combined Set: 8 sets of two genes,  
168 and four sets of three genes (see Table 2 for more details). Despite similarity in the number of genes  
169 to be concatenated, the COMB and MERGE results did not contain any identical concatenated sets.  
170 We constructed phylogenies of each concatenated set and compared the inferred topologies (results in  
171 Table 2). Despite filtering on the magnoliids as sister to eudicots relationship, not all concatenated sets  
172 recovered this relationship with greater than 80 SH-aLRT.

173 Concatenation is a common means for analyzing large phylogenomic analyses, and so it may be  
174 surprising that a relatively small number of genes support concatenation. However, this may be  
175 expected considering the extensive gene tree conflict. While concatenation may be helpful for exploratory  
176 inference to identify dominant signal, it may not be the best approach to address specific and contentious  
177 relationships. Further analysis, such as the one described here, into nodes that conflict with species-tree  
178 methods or are surrounded by gene tree conflict, should be pursued to uncover the most robust  
179 phylogenetic hypothesis upon which to base other evolutionary hypotheses.

180 *Table 2. Comparison of partitioned subsets between combining strategies*

| Algorithm | Gene set | Genes | Sets                | Partitioned Topology         | Subset Relationships         |
|-----------|----------|-------|---------------------|------------------------------|------------------------------|
| MERGE     | combined | 98    | 12<br>(4x3,<br>8x2) | magnoliids+eudicots<br>(100) | magnoliids+eudicots<br>(50%) |

| Algorithm | Gene set | Genes | Sets                 | Partitioned Topology         | Subset Relationships                                                                                         |
|-----------|----------|-------|----------------------|------------------------------|--------------------------------------------------------------------------------------------------------------|
|           |          |       |                      |                              | magnoliids+monocots<br>(0)                                                                                   |
|           | ML       | 44    | 9 (1x3,<br>8x2)      | magnoliids+eudicots<br>(100) | monocots+eudicots (0)<br>magnoliids+eudicots<br>(67%)<br>magnoliids+monocots<br>(0)<br>monocots+eudicots (0) |
| COMB      | combined | 98    | 14<br>(1x3,<br>13x2) | magnoliids+eudicots<br>(100) | magnoliids+eudicots(50%)                                                                                     |
|           |          |       |                      |                              | magnoliids+monocots<br>(0)<br>monocots+eudicots (0)                                                          |
|           | ML       | 44    | 10<br>(3x3,<br>7x2)  | magnoliids+eudicots<br>(100) | magnoliids+eudicots<br>(90%)                                                                                 |
|           |          |       |                      |                              | magnoliids+monocots<br>(0)<br>monocots+eudicots (0)                                                          |

181 *Brackets following a partitioned topology give the SH-aLRT score for that branch, while percentages*  
 182 *following a subset relationship give the proportion of individual partition gene trees supporting the*  
 183 *specified relationship with  $\geq 80$  SH-aLRT*

#### 184 **Implications for plant phylogenetics**

185 The results presented here provide strong support for several relationships that have long been considered  
 186 contentious, and indicate probable resolutions for others. For example, we found more genes and higher  
 187 likelihoods for 1) *Amborella* being sister to the rest of angiosperms and 2) that gymnosperms are  
 188 monophyletic. Several relationships (e.g., among the eudicots and relatives as well as the hornworts,  
 189 liverworts, and mosses) lack enough information to confidently accept any of the alternative resolutions.  
 190 Rather than being dismayed at this apparent failure, we regard this lack of signal as extremely valuable  
 191 information, as it informs where future effort should be focused. Though we identified the relationship  
 192 that was more strongly supported by the data (Table 1), the differences between the alternatives were  
 193 so slight that the current dataset is likely unable to confidently resolve this debate and conducting  
 194 additional analyses with expanded taxa and gene regions is warranted.

195 Among the strongly supported hypotheses, the placement of *Amborella* continues to be a point of major  
 196 contention within the plant community. *Amborella* is a tropical tree with relatively small flowers,  
 197 while the Nymphaeales are aquatic plants with relatively large flowers. The resolution of these taxa in  
 198 relation to the remainder of the flowering plants will inform the life history or early angiosperms (Dark  
 199 and Disturbed, Feild et al. (2004)) as well as the lability of life history and floral traits. Our results  
 200 suggest *Amborella* is sister to all other extant angiosperms, and implies that rates of evolution need



201 not be particularly fast in order to understand the morphological differences between a tropical tree  
202 (*Amborella*) and water lilies (Nymphaeales). Strong support for the monophyly of gymnosperms implies  
203 that the disparity of extant Gymnosperm taxa, including the morphologically diverse Gnetales, emerged  
204 post-divergence with the angiosperm lineage. This reinforces analyses of LEAFY homologs, which  
205 recover Gymnosperm paralogs as monophyletic groups (Sayou et al. 2014), and also lends support to  
206 shared characteristics between Gnetales and angiosperms resulting from convergent evolution (Bowe,  
207 Coat, and others 2000; Hansen et al. 1999).

208 For contentious relationships only weakly supported here, there are several biological questions that  
209 will be answered once these are confidently resolved. The data and analyses presented here suggest  
210 that hornworts are sister to all other land plants. This is consistent with some studies (Nickrent et al.  
211 2000; Nishiyama and Kato 1999), but contradicts the results of others (Cox et al. 2014; Karol et al.  
212 2010; Qiu et al. 2006), including some but not all results of a recent re-analysis of this dataset (Puttick  
213 et al. 2018). If the position of hornworts presented here holds with additional data, it implies that the  
214 absence of stomata in liverworts and some mosses is a derived state resulting from loss of the trait,  
215 suggests a single loss of pyrenoids in non-hornwort land plants (but see Villarreal and Renner 2012),  
216 and questions some inferences on the characteristics of hornwort sporophytes (Qiu et al. 2006). Among  
217 gymnosperms, these data suggest that Gnetales are sister to pines (the “Gnepine” hypothesis; Chaw et  
218 al. 2000), further supporting the lability and rapid evolution of morphological disparity within the  
219 group. Finally, magnoliids are inferred as sister to the eudicot lineages, which has implications on the  
220 origin and divergence times of eudicots and monocots.

## 221 **Implications for future phylogenomic studies**

222 A panacea does not currently exist for phylogenomic analyses. In part, this may be the result of  
223 methods meant to serve too many functions, or applied to use-cases beyond their original design. Some  
224 researchers aim to determine the relative support for contentious relationships. Others only wish to  
225 construct a reasonable, if not ideal, phylogeny for downstream analyses. Others still may be primarily  
226 interested in gene trees. Researchers seeking to perform large-scale phylogenetic inference typically  
227 use quartet-based species tree approaches, and/or concatenation (while modelling some non-topology  
228 related gene-specific properties). The underlying conflict identified by many researchers (Wickett et  
229 al. 2014; Puttick et al. 2018) suggests that concatenation, while helpful for identifying the dominant  
230 signal, may not be ideal for addressing contentious nodes. Our analyses allowed for the examination  
231 of contentious nodes while accommodating for gene tree heterogeneity without the requirement for  
232 concatenation. Furthermore, our targeted exploration of the combinability of gene regions found that  
233 very few genes are optimally modelled by concatenation, even when filtering on those genes that support  
234 one contentious relationship. While concatenation may be a relatively fast method for analyzing  
235 extremely large datasets, it may not be strictly appropriate for both statistical and biological reasons  
236 and may not be helpful for addressing difficult-to-resolve phylogenetic hypotheses.

237 The most common alternative to concatenation, coalescent species tree approaches, often accommodate  
238 one major source of conflict in gene trees without concatenation, ILS (Mirarab, Reaz, et al. 2014).  
239 However, the most sophisticated model-based coalescent approaches are often not computationally  
240 tractable for phylogenomic analyses because of the large sizes of the datasets (Ané et al. 2006; Boussau  
241 et al. 2013). Instead, most phylogenomic analyses that accommodate ILS use quartet methods (e.g.,  
242 ASTRAL) that, while fast and effective, do not account for multiple sources of conflict and make several

243 other assumptions that may or may not be reasonable given the dataset (e.g. equal weighting of gene  
244 trees regardless of properties of the underlying genes). Some researchers have suggested that a solution  
245 may be to filter the data to include only those genes that conflict due to ILS (Knowles et al. 2018;  
246 Huang et al. 2017) or that agree with the accepted relationships (Doyle et al. 2015; Smith, Brown, and  
247 Walker 2018). However, for datasets with a broad scope, several processes may be at play throughout  
248 the phylogeny and it may not be possible to filter based on a single underlying process.

249 Here, we argue that, to address support for contentious relationships, focused branch-based analyses  
250 can provide a thorough examination of the influence on phylogenetic inference from the underlying  
251 data. With the explosion of genomic resources from new projects such as 10KP (Cheng et al. 2018),  
252 computationally efficient methods focused on specific contentious relationships will be necessary to  
253 approach challenges inherent in large datasets.

## 254 Conclusions

255 The results presented here provide strongly supported resolutions for two contentious relationships that  
256 have been hotly debated in the literature: that *Amborella* is the sister lineage to all other angiosperms,  
257 and that gymnosperms are monophyletic. These results have significant implications for understanding  
258 the evolution of land plants and the nature of the ancestral angiosperm. We find weak support for other  
259 contentious relationships, and suggest that these should be revisited once other datasets are amassed.

260 Despite the ability of the methods explored here to accommodate the underlying gene tree uncertainty,  
261 the results presented here rely on the information available in the underlying dataset. While this  
262 dataset is not comprehensive, it *does* represent extensive sequencing of transcriptomes and genomes  
263 for the taxa included. We can say, with confidence, what these data support or do not support, but  
264 different datasets (e.g., based on different taxa, different homology analyses) may have stronger signal  
265 for relationships that are resolved more equivocally here. We recommend analyzing these future datasets  
266 with an eye toward hypotheses of specific phylogenetic relationships. Our novel approach provides  
267 insight into several of the most contentious relationships across land plants and is broadly applicable  
268 among different groups. Approaches that ascertain the support for alternative resolutions should be  
269 used to resolve contentious branches across the Tree of Life.

## 270 Materials and Methods

### 271 Datasets

272 We acquired and analyzed the Wickett et al. (2014) dataset of transcriptomes and genomes covering  
273 plants available from [http://mirrors.iplantcollaborative.org/onekp\\_pilot](http://mirrors.iplantcollaborative.org/onekp_pilot). There were several different  
274 filtering methods and approaches used in the original manuscript and, based on conversations with  
275 the corresponding author, we analyzed the filtered nucleotide dataset with third positions removed.  
276 The third positions were removed because of the problems with variation and GC content that causes  
277 problems with the placement of the lycophytes (Wickett et al. 2014). This dataset consisted of 852  
278 aligned genes. We did not conduct any other filtering or alteration of these data before conducting the  
279 analyses performed as part of this study.

## 280 Phylogenetic analyses

281 We calculated gene trees for each of the 852 genes using iqtree (v. 1.6.3; Nguyen et al. 2014). We used  
282 the GTR+G model of evolution and calculated maximum likelihood trees along with SH-aLRT values  
283 (Guindon et al. 2010). For all constrained analyses, we conducted additional maximum likelihood  
284 analyses with the same model of evolution but constrained on the branch of interest.

## 285 Conflict analyses

286 We conducted several different conflict analyses. First, we identified the conflicting branches between  
287 the maximum likelihood gene trees, ignoring branches that had less than 80% SH-aLRT (Guindon et al.  
288 2010), and the maximum likelihood tree from the original publication (Fig. 2; Wickett et al. 2014). These  
289 analyses were conducted using the program bp available from <https://github.com/FePhyFoFum/gophy>.  
290 We reported the conflicting and concordant gene trees (Fig. 1). We placed these conflicting and  
291 supporting statistics in a temporal context by calculating the divergence times of each split based on  
292 the TIMETREE of life (Hedges, Dudley, and Kumar 2006). By examining the dominant conflicting  
293 alternatives, we established which constraints to construct and compare for further analyses. Because  
294 the gene regions contain partially overlapping taxa, automated discovery of all conflicting relationships  
295 concurrently can be challenging. To overcome these challenges, we examine each constraint individually.

296 To determine the difference in the lnL values among conflicting resolutions, we conducted the constrained  
297 phylogenetic analyses (with parameters described in the *Phylogenetic analyses* section above) and  
298 compared the lnL values of the alternative resolutions. We then examined those results that had a  
299 difference in the lnL of greater than 2, as is considered standard for statistical significance (Edwards  
300 1984). For each gene, we noted the relationship with the highest log-likelihood and summed the  
301 difference of that and the second best relationship ( $DlnL$ ) across all genes.

302 We also examined nested conflicts. In particular, for the genes identified as supporting the dominant  
303 relationship of the eudicot lineages, we examined the distribution of conflict. We then examined those  
304 genes that supported both the eudicot lineages and the relationship of *Amborella* as sister to the rest of  
305 angiosperms. Finally, of those genes, we determined which supported the alternative Gymnosperm  
306 relationships. We conducted each of these nested analyses using the same methods as described above.

## 307 Concatenation tests

308 To explore whether concatenation was supported for different sets of genes, we conducted model fit  
309 analyses on subsets of the data. We concatenated the data using the phyx program pxcat (Brown,  
310 Walker, and Smith 2017) and we calculated and compared Aikake Information Criterion scores that  
311 were corrected for sample size (AICc) on concatenated and unconcatenated analyses. We used the  
312 number of sites in an alignment as the sample size for the AIC correction as also calculated by iqtree.  
313 An AIC framework has been commonly used extensively in molecular model comparisons and has  
314 been used by several authors (e.g., Kubatko 2009; Theobald 2010; Walker, Brown, and Smith 2018)  
315 for comparisons between phylogenies and datasets. Because conducting every possible comparison of  
316 every possible combination of genes is unfeasible, we instead constructed graphs based on Robinson  
317 Foulds (RF; Robinson and Foulds 1981) distance without considering branch lengths. As above, we  
318 ignored branches with less than 80 SH-aLRT (Shimodaira and Hasegawa 1999) support as calculated

319 by IQ-TREE. For RF comparisons where taxa were partially overlapping, we removed tips that were  
320 present in only one tree before the comparison was calculated. These graphs describe a distance  
321 between genes based on topology and so we sorted the RF distances by the shortest and compared  
322 concatenation vs separate gene trees. If combined analyses resulted in a lower AIC score, any future  
323 comparison involving any of the constituent genes of the combination considered the combined gene  
324 set (and not the individual gene). For example, if gene 1 and 2 were combined based on AIC score,  
325 then an attempt to combine gene 3 and 1 would consider combining 3 and 1+2 and not 3 and 1. This  
326 allowed for concatenated datasets to grow to more than 2 genes. This analysis was effectively a greedy  
327 hill climbing analysis. To demonstrate the effectiveness of the approach, we conducted small tests  
328 (results in the Supplementary Materials).

329 As these analyses were conducted for demonstration purposes, we did not conduct exhaustive testing of  
330 combinability of the entire dataset. Instead, we conducted these tests on two gene sets that supported  
331 the eudicot relationship. First, we tested the set of genes that supported the eudicot relationship in the  
332 ML tree that did not have a branch length longer than 2.5 and did not have outgroup taxa falling in  
333 the ingroup. Second, we tested the set of genes that did not only support the relationship in the ML  
334 tree but also displayed the relationship in the ML gene tree with SH-aLRT support higher than 80 and  
335 with no outlying branch lengths or outgroup taxa falling in the ingroup.

336 Concatenated analyses were conducted using `iqtree v. 1.6.3` and the `-sp` option for branch lengths  
337 unlinked among partitions. We also tested the `-spp` and `q` options for proportional branches and shared  
338 branch lengths respectively. However, these resulted in fewer concatenated branches. A more thorough  
339 examination of these options and their behaviour is the focus of future studies.

340 We compared the results of our analyses to the PartitionFinder ‘greedy’ algorithm implemented in  
341 IQ-TREE using the option `-m MERGE`, specifying the GTR+G model and assessing partitions with the  
342 branch-unlinked model with `-sp`. We compared the gene trees of each merged partition in IQ-TREE  
343 with `-sp` and `-m GTR+G` and assessed the optimal partitioning scheme on the full data similarly with  
344 `-sp` and `-m GTR+G`.

## 345 Acknowledgments

346 This work was supported by funding from NSF DEB 1354048 (J.F.W. and S.A.S.) and NSF AVATOL  
347 1207915 (J.W.B. and S.A.S.). We appreciate comments from Ning Wang, Caroline Parins-Fukuchi,  
348 Diego Alvarado Serrano, Greg Stull, Drew Larson, Hector Fox, and Richie Hodel.

## 349 References

- 350 Ahrenfeldt, Johanne, Carina Skaarup, Henrik Hasman, Anders Gorm Pedersen, Frank Møller Aarestrup,  
351 and Ole Lund. 2017. “Bacterial Whole Genome-Based Phylogeny: Construction of a New Benchmarking  
352 Dataset and Assessment of Some Existing Methods.” *BMC Genomics* 18 (1). BioMed Central: 19.
- 353 Ané, Cécile, Bret Larget, David A Baum, Stacey D Smith, and Antonis Rokas. 2006. “Bayesian  
354 Estimation of Concordance Among Gene Trees.” *Molecular Biology and Evolution* 24 (2). Oxford  
355 University Press: 412–26.
- 356 Boussau, Bastien, Gergely J Szöllösi, Laurent Duret, Manolo Gouy, Eric Tannier, and Vincent Daubin.  
357 2013. “Genome-Scale Coestimation of Species and Gene Trees.” *Genome Research* 23 (2). Cold Spring

- 358 Harbor Lab: 323–30.
- 359 Bowe, L Michelle, Gwénaële Coat, and others. 2000. “Phylogeny of Seed Plants Based on All Three  
360 Genomic Compartments: Extant Gymnosperms Are Monophyletic and Gnetales’ Closest Relatives Are  
361 Conifers.” *Proceedings of the National Academy of Sciences* 97 (8). National Acad Sciences: 4092–7.
- 362 Brown, Jeremy M, and Robert C Thomson. 2016. “Bayes Factors Unmask Highly Variable Information  
363 Content, Bias, and Extreme Influence in Phylogenomic Analyses.” *Systematic Biology* 66 (4). Oxford  
364 University Press: 517–30.
- 365 Brown, Joseph W, Joseph F Walker, and Stephen A Smith. 2017. “Phyx: Phylogenetic Tools for Unix.”  
366 *Bioinformatics* 33 (12). Oxford University Press: 1886–8.
- 367 Chaw, Shu-Miaw, Christopher L Parkinson, Yuchang Cheng, Thomas M Vincent, and Jeffrey D  
368 Palmer. 2000. “Seed Plant Phylogeny Inferred from All Three Plant Genomes: Monophyly of Extant  
369 Gymnosperms and Origin of Gnetales from Conifers.” *Proceedings of the National Academy of Sciences*  
370 97 (8). National Acad Sciences: 4086–91.
- 371 Cheng, Shifeng, Michael Melkonian, Stephen A Smith, Samuel Brockington, John M Archibald, Pierre-  
372 Marc Delaux, Fay-Wei Li, et al. 2018. “10KP: A Phylodiverse Genome Sequencing Plan.” *GigaScience*  
373 7 (3). Oxford University Press: giy013.
- 374 Cox, Cymon J., Blaise Li, Peter G. Foster, T. Martin Embley, and Peter Civaň. 2014. “Conflicting  
375 Phylogenies for Early Land Plants Are Caused by Composition Biases Among Synonymous Substitutions.”  
376 *Systematic Biology* 63 (2). Oxford University Press: 272–79. <http://dx.doi.org/10.1093/sysbio/syt109>.
- 377 Doyle, Vinson P, Randee E Young, Gavin JP Naylor, and Jeremy M Brown. 2015. “Can We Identify  
378 Genes with Increased Phylogenetic Reliability?” *Systematic Biology* 64 (5). Oxford University Press:  
379 824–37.
- 380 Dunn, Casey W, Andreas Hejnl, David Q Matus, Kevin Pang, William E Browne, Stephen A Smith,  
381 Elaine Seaver, et al. 2008. “Broad Phylogenomic Sampling Improves Resolution of the Animal Tree of  
382 Life.” *Nature* 452 (7188). Nature Publishing Group: 745.
- 383 Edwards, Anthony William Fairbank. 1984. *Likelihood*. CUP Archive.
- 384 Edwards, Scott V. 2009. “Is a New and General Theory of Molecular Systematics Emerging?” *Evolution*  
385 63 (1). Wiley Online Library: 1–19.
- 386 Edwards, Scott V, Liang Liu, and Dennis K Pearl. 2007. “High-Resolution Species Trees Without  
387 Concatenation.” *Proceedings of the National Academy of Sciences* 104 (14). National Acad Sciences:  
388 5936–41.
- 389 Edwards, Scott V, Zhenxiang Xi, Axel Janke, Brant C Faircloth, John E McCormack, Travis C Glenn,  
390 Bojian Zhong, et al. 2016. “Implementing and Testing the Multispecies Coalescent Model: A Valuable  
391 Paradigm for Phylogenomics.” *Molecular Phylogenetics and Evolution* 94. Elsevier: 447–62.
- 392 Feild, Taylor S, Nan Crystal Arens, James A Doyle, Todd E Dawson, and Michael J Donoghue. 2004.  
393 “Dark and Disturbed: A New Image of Early Angiosperm Ecology.” *Paleobiology* 30 (1). BioOne:  
394 82–107.
- 395 Feuda, Roberto, Martin Dohrmann, Walker Pett, Hervé Philippe, Omar Rota-Stabelli, Nicolas Lartillot,  
396 Gert Wörheide, and Davide Pisani. 2017. “Improved Modeling of Compositional Heterogeneity Supports  
397 Sponges as Sister to All Other Animals.” *Current Biology* 27 (24). Elsevier: 3864–70.

- 398 Guindon, Stéphane, Jean-François Dufayard, Vincent Lefort, Maria Anisimova, Wim Hordijk, and  
399 Olivier Gascuel. 2010. “New Algorithms and Methods to Estimate Maximum-Likelihood Phylogenies:  
400 Assessing the Performance of Phyml 3.0.” *Systematic Biology* 59 (3). Oxford University Press: 307–21.
- 401 Hansen, Andrea, Sabine Hansmann, Tahir Samigullin, Andrey Antonov, and William Martin. 1999.  
402 “Gnetum and the Angiosperms: Molecular Evidence That Their Shared Morphological Characters Are  
403 Convergent, Rather Than Homologous.” *Molecular Biology and Evolution* 16 (7). Oxford University  
404 Press: 1006–6.
- 405 Hedges, S Blair, Joel Dudley, and Sudhir Kumar. 2006. “TimeTree: A Public Knowledge-Base of  
406 Divergence Times Among Organisms.” *Bioinformatics* 22 (23). Oxford University Press: 2971–2.
- 407 Huang, Huateng, Jeet Sukumaran, Stephen A Smith, and Lacey Knowles. 2017. “Cause of Gene  
408 Tree Discord? Distinguishing Incomplete Lineage Sorting and Lateral Gene Transfer in Phylogenetics.”  
409 *PeerJ PrePrints* 5. PeerJ, Inc.: e3489v1.
- 410 Huelsenbeck, John P, JJ Bull, and Clifford W Cunningham. 1996. “Combining Data in Phylogenetic  
411 Analysis.” *Trends in Ecology & Evolution* 11 (4). Elsevier: 152–58.
- 412 Jarvis, Erich D, Siavash Mirarab, Andre J Aberer, Bo Li, Peter Houde, Cai Li, Simon YW Ho, et al.  
413 2014. “Whole-Genome Analyses Resolve Early Branches in the Tree of Life of Modern Birds.” *Science*  
414 346 (6215). American Association for the Advancement of Science: 1320–31.
- 415 Kalyanamoorthy, Subha, Bui Quang Minh, Thomas KF Wong, Arndt von Haeseler, and Lars S Jermin.  
416 2017. “ModelFinder: Fast Model Selection for Accurate Phylogenetic Estimates.” *Nature Methods* 14  
417 (6). Nature Publishing Group: 587.
- 418 Karol, Kenneth G., Kathiravetpillai Arumuganathan, Jeffrey L. Boore, Aaron M. Duffy, Karin DE  
419 Everett, John D. Hall, S. Kellon Hansen, et al. 2010. “Complete Plastome Sequences of Equisetum  
420 Arvense and Isoetes Flaccida: Implications for Phylogeny and Plastid Genome Evolution of Early Land  
421 Plant Lineages.” *BMC Evolutionary Biology* 10 (1): 321. <https://doi.org/10.1186/1471-2148-10-321>.
- 422 Kluge, Arnold G. 1989. “A Concern for Evidence and a Phylogenetic Hypothesis of Relationships  
423 Among Epicrates (Boidae, Serpentes).” *Systematic Biology* 38 (1). Society of Systematic Zoology: 7–25.
- 424 Knowles, L Lacey, Huateng Huang, Jeet Sukumaran, and Stephen A Smith. 2018. “A Matter of  
425 Phylogenetic Scale: Distinguishing Incomplete Lineage Sorting from Lateral Gene Transfer as the Cause  
426 of Gene Tree Discord in Recent Versus Deep Diversification Histories.” *American Journal of Botany*  
427 105 (3). Wiley Online Library: 376–84.
- 428 Kubatko, Laura Salter. 2009. “Identifying Hybridization Events in the Presence of Coalescence via  
429 Model Selection.” *Systematic Biology* 58 (5). Oxford University Press: 478–88.
- 430 Lanfear, Robert, Paul B Frandsen, April M Wright, Tereza Senfeld, and Brett Calcott. 2016. “Partition-  
431 Finder 2: New Methods for Selecting Partitioned Models of Evolution for Molecular and Morphological  
432 Phylogenetic Analyses.” *Molecular Biology and Evolution* 34 (3). Oxford University Press: 772–73.
- 433 Liu, Liang, Lili Yu, Dennis K Pearl, and Scott V Edwards. 2009. “Estimating Species Phylogenies  
434 Using Coalescence Times Among Sequences.” *Systematic Biology* 58 (5). Oxford University Press:  
435 468–77.
- 436 Maddison, Wayne P. 1997. “Gene Trees in Species Trees.” *Systematic Biology* 46 (3). Oxford University  
437 Press: 523–36.

- 438 Mirarab, Siavash, Md Shamsuzzoha Bayzid, Bastien Boussau, and Tandy Warnow. 2014. “Statistical  
439 Binning Enables an Accurate Coalescent-Based Estimation of the Avian Tree.” *Science* 346 (6215).  
440 American Association for the Advancement of Science: 1250463.
- 441 Mirarab, Siavash, Rezwana Reaz, Md S Bayzid, Théo Zimmermann, M Shel Swenson, and Tandy  
442 Warnow. 2014. “ASTRAL: Genome-Scale Coalescent-Based Species Tree Estimation.” *Bioinformatics*  
443 30 (17). Oxford University Press: i541–i548.
- 444 Neupane, Suman, Karolina Fucikova, Louise A Lewis, Lynn Kuo, Ming-Hui Chen, and Paul Lewis.  
445 2018. “Assessing Combinability of Phylogenomic Data Using Bayes Factors.” *bioRxiv*. Cold Spring  
446 Harbor Laboratory, 250969.
- 447 Nguyen, Lam-Tung, Heiko A Schmidt, Arndt von Haeseler, and Bui Quang Minh. 2014. “IQ-Tree: A  
448 Fast and Effective Stochastic Algorithm for Estimating Maximum-Likelihood Phylogenies.” *Molecular*  
449 *Biology and Evolution* 32 (1). Oxford University Press: 268–74.
- 450 Nickrent, Daniel L., Christopher L. Parkinson, Jeffrey D. Palmer, and R. Joel Duff. 2000. “Multigene  
451 Phylogeny of Land Plants with Special Reference to Bryophytes and the Earliest Land Plants.” *Molecular*  
452 *Biology and Evolution* 17 (12): 1885–95. <https://doi.org/10.1093/oxfordjournals.molbev.a026290>.
- 453 Nishiyama, T, and M Kato. 1999. “Molecular Phylogenetic Analysis Among Bryophytes and Tracheo-  
454 phytes Based on Combined Data of Plastid Coded Genes and the 18S rRNA Gene.” *Molecular Biology*  
455 *and Evolution* 16 (8): 1027–36. <https://doi.org/10.1093/oxfordjournals.molbev.a026192>.
- 456 Penny, D, MD Hendy, EA Zimmer, and RK Hamby. 1990. “Trees from Sequences: Panacea or Pandora’s  
457 Box?” *Australian Systematic Botany* 3 (1). CSIRO: 21–38.
- 458 Puttick, Mark N, Jennifer L Morris, Tom A Williams, Cymon J Cox, Dianne Edwards, Paul Kenrick,  
459 Silvia Pressel, et al. 2018. “The Interrelationships of Land Plants and the Nature of the Ancestral  
460 Embryophyte.” *Current Biology* 28 (5). Elsevier: 733–45.
- 461 Qiu, Yin-Long, Libo Li, Bin Wang, Zhiduan Chen, Volker Knoop, Milena Groth-Malonek, Olena  
462 Dombrovska, et al. 2006. “The Deepest Divergences in Land Plants Inferred from Phylogenomic  
463 Evidence.” *Proceedings of the National Academy of Sciences* 103 (42). National Academy of Sciences:  
464 15511–6. <https://doi.org/10.1073/pnas.0603335103>.
- 465 Robinson, David F, and Leslie R Foulds. 1981. “Comparison of Phylogenetic Trees.” *Mathematical*  
466 *Biosciences* 53 (1-2). Elsevier: 131–47.
- 467 Sauquet, Hervé, Maria von Balthazar, Susana Magallón, James A Doyle, Peter K Endress, Emily J  
468 Bailes, Erica Barroso de Morais, et al. 2017. “The Ancestral Flower of Angiosperms and Its Early  
469 Diversification.” *Nature Communications* 8. Nature Publishing Group: 16047.
- 470 Sayou, Camille, Marie Monniaux, Max H Nanao, Edwige Moyroud, Samuel F Brockington, Emmanuel  
471 Thévenon, Hicham Chahtane, et al. 2014. “A Promiscuous Intermediate Underlies the Evolution of  
472 Leafy Dna Binding Specificity.” *Science* 343 (6171). American Association for the Advancement of  
473 Science: 645–48.
- 474 Shen, Xing-Xing, Chris Todd Hittinger, and Antonis Rokas. 2017. “Contentious Relationships in  
475 Phylogenomic Studies Can Be Driven by a Handful of Genes.” *Nature Ecology & Evolution* 1 (5).  
476 Nature Publishing Group: 0126.
- 477 Shen, Xing-Xing, Xiaofan Zhou, Jacek Kominek, Cletus P Kurtzman, Chris Todd Hittinger, and

- 478 Antonis Rokas. 2016. “Reconstructing the Backbone of the Saccharomycotina Yeast Phylogeny Using  
479 Genome-Scale Data.” *G3: Genes, Genomes, Genetics* 6 (12). G3: Genes, Genomes, Genetics: 3927–39.
- 480 Shimodaira, Hidetoshi, and Masami Hasegawa. 1999. “Multiple Comparisons of Log-Likelihoods with  
481 Applications to Phylogenetic Inference.” *Molecular Biology and Evolution* 16 (8). Oxford University  
482 Press: 1114–4.
- 483 Simion, Paul, Hervé Philippe, Denis Baurain, Muriel Jager, Daniel J. Richter, Arnaud Di Franco,  
484 Béatrice Roure, et al. 2017. “A Large and Consistent Phylogenomic Dataset Supports Sponges as  
485 the Sister Group to All Other Animals.” *Current Biology* 27 (7): 958–67. <https://doi.org/https://doi.org/10.1016/j.cub.2017.02.031>.
- 487 Smith, Stephen A, Joseph W Brown, and Joseph F Walker. 2018. “So Many Genes, so Little Time: A  
488 Practical Approach to Divergence-Time Estimation in the Genomic Era.” *PloS One* 13 (5). Public  
489 Library of Science: e0197433.
- 490 Smith, Stephen A, Michael J Moore, Joseph W Brown, and Ya Yang. 2015. “Analysis of Phylogenomic  
491 Datasets Reveals Conflict, Concordance, and Gene Duplications with Examples from Animals and  
492 Plants.” *BMC Evolutionary Biology* 15 (1). BioMed Central: 150.
- 493 Springer, Mark S, and John Gatesy. 2016. “The Gene Tree Delusion.” *Molecular Phylogenetics and  
494 Evolution* 94. Elsevier: 1–33.
- 495 Theobald, Douglas L. 2010. “A Formal Test of the Theory of Universal Common Ancestry.” *Nature*  
496 465 (7295). Nature Publishing Group: 219.
- 497 Villarreal, Juan Carlos, and Susanne S Renner. 2012. “Hornwort Pyrenoids, Carbon-Concentrating  
498 Structures, Evolved and Were Lost at Least Five Times During the Last 100 Million Years.” *Proceedings  
499 of the National Academy of Sciences* 109 (46). National Acad Sciences: 18873–8.
- 500 Walker, Joseph F, Joseph W Brown, and Stephen A Smith. 2018. “Analyzing Contentious Relationships  
501 and Outlier Genes in Phylogenomics.” *Systematic Biology* syy043. Oxford University Press. <https://doi.org/10.1093/sysbio/syy043>.
- 503 Walker, Joseph F, Ya Yang, Tao Feng, Alfonso Timoneda, Jessica Mikenas, Vera Hutchison, Caroline  
504 Edwards, et al. 2018. “From Cacti to Carnivores: Improved Phylotranscriptomic Sampling and  
505 Hierarchical Homology Inference Provide Further Insight into the Evolution of Caryophyllales.” *American  
506 Journal of Botany* 105 (3). Wiley Online Library: 446–62.
- 507 Whelan, Nathan V, Kevin M Kocot, Tatiana P Moroz, Krishanu Mukherjee, Peter Williams, Gustav  
508 Paulay, Leonid L Moroz, and Kenneth M Halanych. 2017. “Ctenophore Relationships and Their  
509 Placement as the Sister Group to All Other Animals.” *Nature Ecology & Evolution* 1 (11). Nature  
510 Publishing Group: 1737.
- 511 Wickett, Norman J, Siavash Mirarab, Nam Nguyen, Tandy Warnow, Eric Carpenter, Naim Matasci,  
512 Saravanaraj Ayyampalayam, et al. 2014. “Phylotranscriptomic Analysis of the Origin and Early  
513 Diversification of Land Plants.” *Proceedings of the National Academy of Sciences* 111 (45). National  
514 Acad Sciences: E4859–E4868.
- 515 Xi, Zhenxiang, Liang Liu, Joshua S Rest, and Charles C Davis. 2014. “Coalescent Versus Concatenation  
516 Methods and the Placement of Amborella as Sister to Water Lilies.” *Systematic Biology* 63 (6). Oxford  
517 University Press: 919–32.



518 Yang, Ya, and Stephen A Smith. 2014. “Orthology Inference in Nonmodel Organisms Using Transcrip-  
519 tomes and Low-Coverage Genomes: Improving Accuracy and Matrix Occupancy for Phylogenomics.”  
520 *Molecular Biology and Evolution* 31 (11). Oxford University Press: 3081–92.
